CORRECTION

# Correction: The oldest fossil mushroom

The *PLOS ONE* Editors

Following publication of this article [1], the authors contacted *PLOS ONE* to raise to our attention concerns that the genus and species names (*Gondwanagaricites* and *Gondwanagaricites magnificus*, respectively) did not meet the requirements of Articles 42.1, 35.1, and 43.3 under the International Code of Nomenclature for Algae, Fungi, and Plants. Specifically, a MycoBank number for the genus was not included in the paper, and the illustration depicting the holotype (Fig 1A) was not specifically identified.

The genus and species names have now been published in a Mycological Progress article [2], in which new MycoBank numbers are assigned:

*Gondwanagaricites* Heads, A.N. Mill. et J.L. Crane, gen. nov. MB821896

*Gondwanagaricites magnificus* Heads, A.N. Mill. et J.L. Crane, sp. nov. MB821897

The *PLOS ONE* Editors regret a delay in issuing a Correction to the *PLOS ONE* article and we ask readers to refer to the Mycological Progress article [2] when referring to the species name and MycoBank numbers.

## References

1. Heads SW, Miller AN, Crane JL, Thomas MJ, Ruffatto DM, Methven AS, et al. (2017) The oldest fossil mushroom. *PLoS ONE* 12(6): e0178327. <https://doi.org/10.1371/journal.pone.0178327> PMID: 28591180
2. Heads SW, Miller AN, Crane JL (2017) On the name of the oldest fossil mushroom. *Mycol Progress* 16:1071–1072. <https://doi.org/10.1007/s11557-017-1355-4>

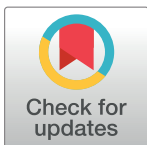

## OPEN ACCESS

**Citation:** The *PLOS ONE* Editors (2018) Correction: The oldest fossil mushroom. *PLoS ONE* 13(6): e0199660. <https://doi.org/10.1371/journal.pone.0199660>

**Published:** June 21, 2018

**Copyright:** © 2018 The PLOS ONE Editors. This is an open access article distributed under the terms of the [Creative Commons Attribution License](https://creativecommons.org/licenses/by/4.0/), which permits unrestricted use, distribution, and reproduction in any medium, provided the original author and source are credited.
